# Supplementary material for: Accumulation of Anthocyanidins Determines Leaf Color of Liquidambar Formosana as Revealed by Transcriptome Sequencing and Metabolism Analysis
Source: MDPI journal article supplement (doi:10.3390/cimb44010018), 2022-01-07
Supplement: s1 [file s1]

Supplementary Figure S4: Expression profile of leaf color related genes was Z-score normalized and hierarchically clustered in the heat map.

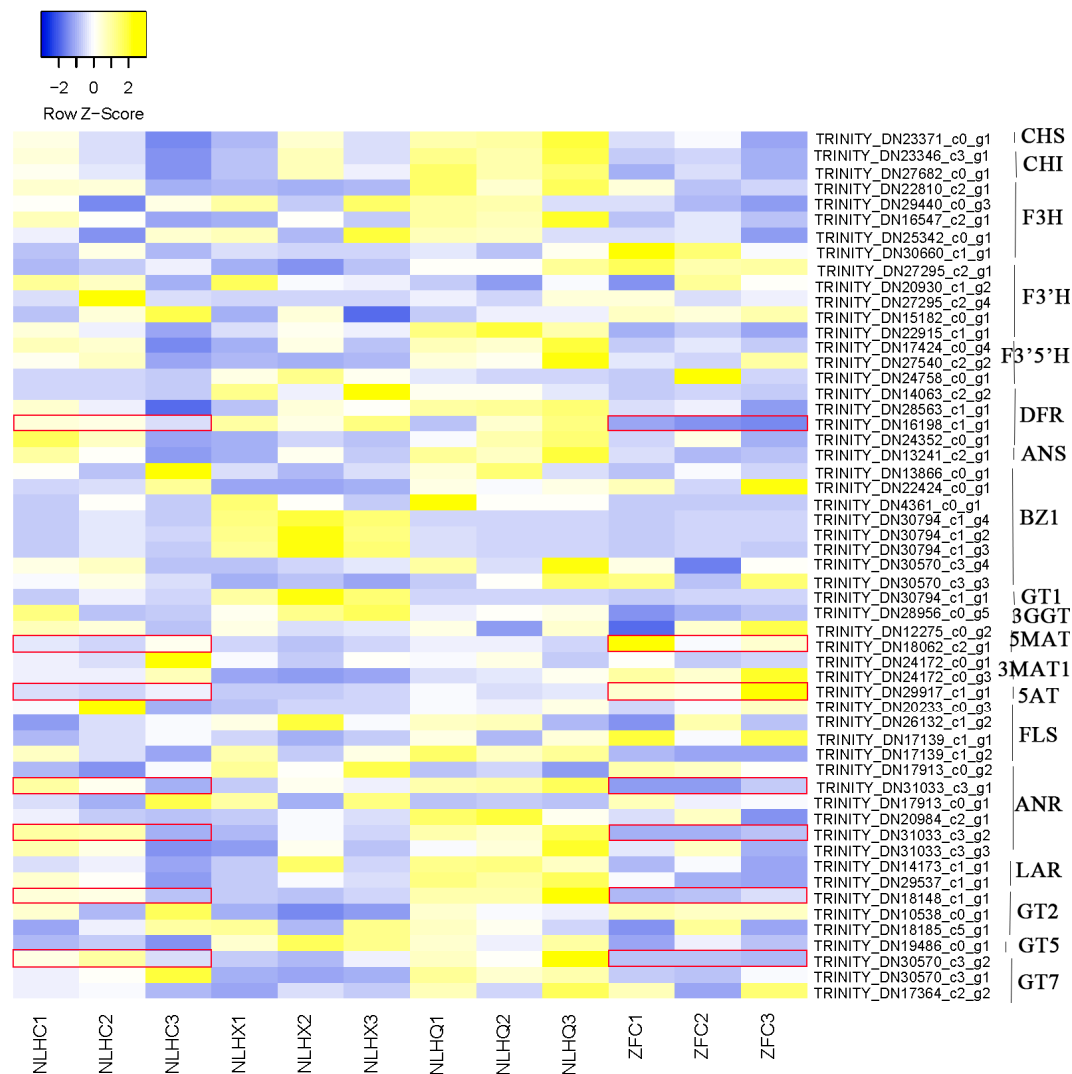

Notes: The DEGs between NLHC and ZFC were highlight in red box.
