# Supplementary material for: Accumulation of Anthocyanidins Determines Leaf Color of Liquidambar Formosana as Revealed by Transcriptome Sequencing and Metabolism Analysis
Source: MDPI journal article supplement (doi:10.3390/cimb44010018), 2022-01-07
Supplement: s1 [file s1]

Table S7 The primers used for qRT-PCR analysis

| Genes           | Description | Sequences (5' - 3')   | Amplicons (bp) |
|-----------------|-------------|-----------------------|----------------|
| <i>LfCHS</i>    | Forward     | CTCGCTTTACTGGATTGCCC  | 229            |
|                 | Reverse     | CCCAAAGAGTACACCCCACT  |                |
| <i>LfCHI</i>    | Forward     | AGCTCTCGACCTGAACACTC  | 218            |
|                 | Reverse     | TGGACCAATCTAACCCCACC  |                |
| <i>LfF3H</i>    | Forward     | CATGGGGCTAGAGAAGGAGG  | 163            |
|                 | Reverse     | ACCCACCTGATCTTGAAGCA  |                |
| <i>LfF3'H</i>   | Forward     | TCCTCACCACCACTTCCATC  | 198            |
|                 | Reverse     | TCATCTCTTCTCGGGCAAGG  |                |
| <i>LfF3'5'H</i> | Forward     | GATCGAACGTGGGATGAAGC  | 106            |
|                 | Reverse     | ATCCGGTTTCCCACTACGTT  |                |
| <i>LfDFR</i>    | Forward     | CGGTTCCCTGCAGATGATGTG | 193            |
|                 | Reverse     | GAGGGAAGCTTTGATGACGC  |                |
| <i>LfANS</i>    | Forward     | GGAAGTTGGTGGCATGGAAG  | 199            |
|                 | Reverse     | TGAATTTGGGACGCACTTGG  |                |
| <i>LfBZ1</i>    | Forward     | TCCCGTCCCGAAATCCTAAC  | 106            |
|                 | Reverse     | ATCTTCCTTCCACTCTCGGC  |                |
| <i>LfGT1</i>    | Forward     | GGTGGCCTTTGTATGCTGAG  | 133            |
|                 | Reverse     | AACTCCCTCACTCGCTTCTC  |                |
| <i>LfGT2</i>    | Forward     | GCTCCCCAGTTACAAGTCCT  | 166            |
|                 | Reverse     | TTTCCCACACGTCCTCTACC  |                |
| <i>Lf5MAT2</i>  | Forward     | CGATCGAGTTACTTGTGCTGG | 134            |
|                 | Reverse     | GATGGTGATGGGATAGAGGCA |                |
| <i>Lf5AT</i>    | Forward     | AACTGAATCCCCATCCACGT  | 137            |
|                 | Reverse     | CGCAGACCACAATTCCTAGC  |                |
| <i>LfFLS</i>    | Forward     | GTCACCTGCAACACCAAGAG  | 162            |
|                 | Reverse     | CGATTGTAATGCCGAGGGTG  |                |
| <i>LfANR</i>    | Forward     | GTGGGTGGCTTCTGAGTAGTC | 186            |
|                 | Reverse     | GATCAAGCCAGCAATCCAGG  |                |
| <i>LfLAR</i>    | Forward     | CTGGCTGCGAAATGGAATGA  | 227            |
|                 | Reverse     | TTCAACGACTTCATTGCCCG  |                |
| <i>LfMYBS3</i>  | Forward     | GCAACATGGCAGGTCATCAT  | 208            |
|                 | Reverse     | TGATGGCGTGAAGGTTGTTG  |                |
| <i>LfMYBS1</i>  | Forward     | AAGTACTTCTGGGCATGGCT  | 116            |
|                 | Reverse     | AGGTTGTTTCTCCTTGGCCT  |                |
| <i>LfMYB4</i>   | Forward     | TCTCCCCGCTATCAATGACC  | 132            |
|                 | Reverse     | AGTTGCAGGCTGAGATGGAT  |                |
| <i>LfMYBC</i>   | Forward     | TTTGTTCGGAGCAAGGCATC  | 150            |
|                 | Reverse     | CCCCGCATTAACTCATCCG   |                |

|                 |         |                      |     |
|-----------------|---------|----------------------|-----|
| <i>LfbHLH63</i> | Forward | TGTTGCACTGTCTGAACACG | 209 |
|                 | Reverse | CTGAAGCTGCTGTCCTTGAC |     |
| <i>LfbHLH48</i> | Forward | GGTGAAGAACGAACCGATGG | 146 |
|                 | Reverse | TGTTCTTCTTGCTCGGTCCT |     |
| <i>LfbHLH67</i> | Forward | AGAAGCCATGGGAGAGGAAC | 188 |
|                 | Reverse | TTGTTCTTGGTTGCACTCGG |     |

---
