# Supplementary material for: Accumulation of Anthocyanidins Determines Leaf Color of Liquidambar Formosana as Revealed by Transcriptome Sequencing and Metabolism Analysis
Source: MDPI journal article supplement (doi:10.3390/cimb44010018), 2022-01-07

Supplementary Figure S5: Correlation of gene expression obtained from qRT-PCR analysis and RNA-Seq for experiments validation.

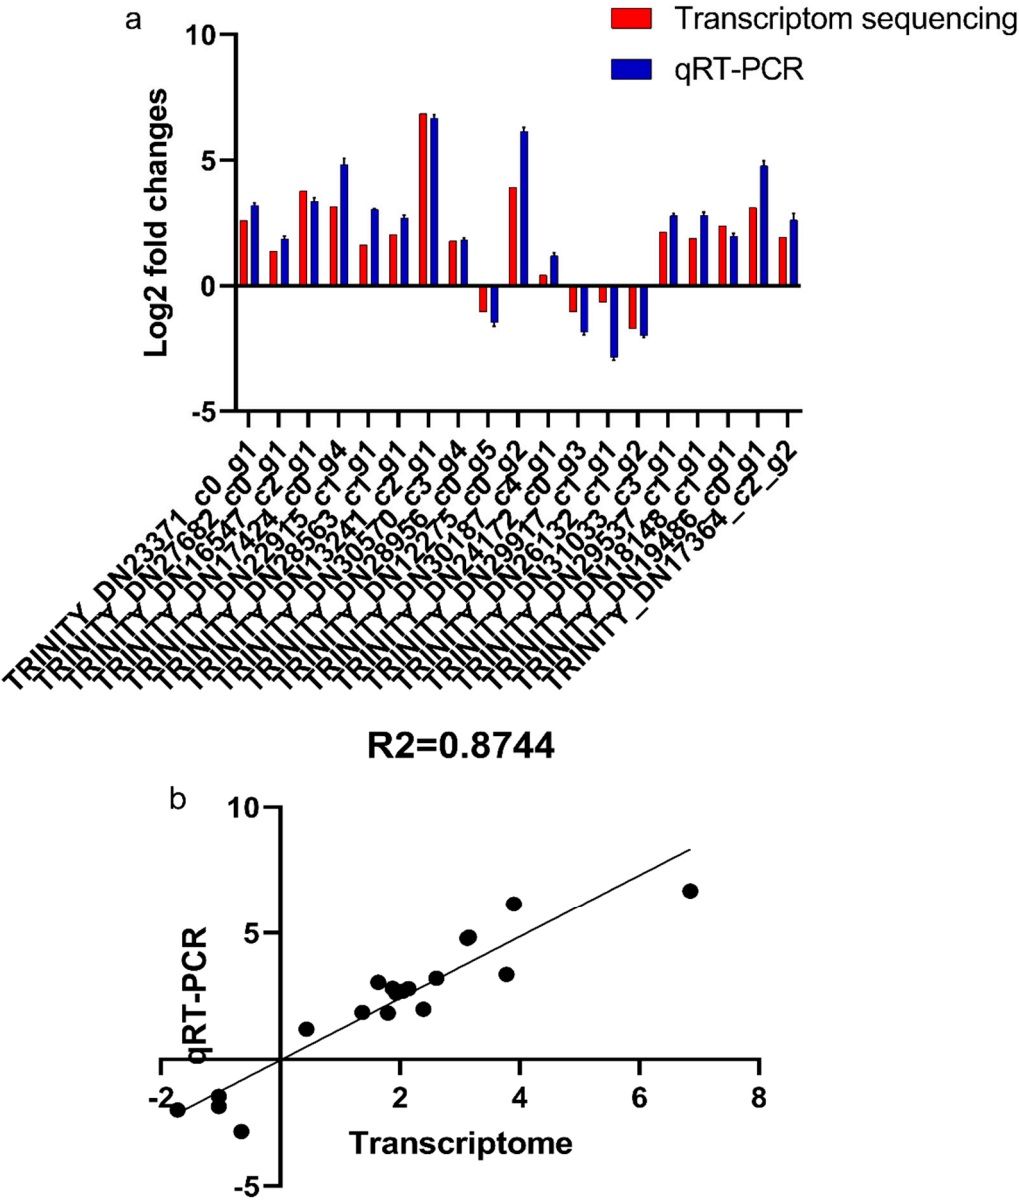

Supplement: s1 [file s1]
