# Supplementary material for: Accumulation of Anthocyanidins Determines Leaf Color of Liquidambar Formosana as Revealed by Transcriptome Sequencing and Metabolism Analysis
Source: MDPI journal article supplement (doi:10.3390/cimb44010018), 2022-01-07

Supplementary Figure S6: Expression profile of transcription factors related to anthocyanins biosynthesis was Z-score normalized and hierarchically clustered in the heatmap.

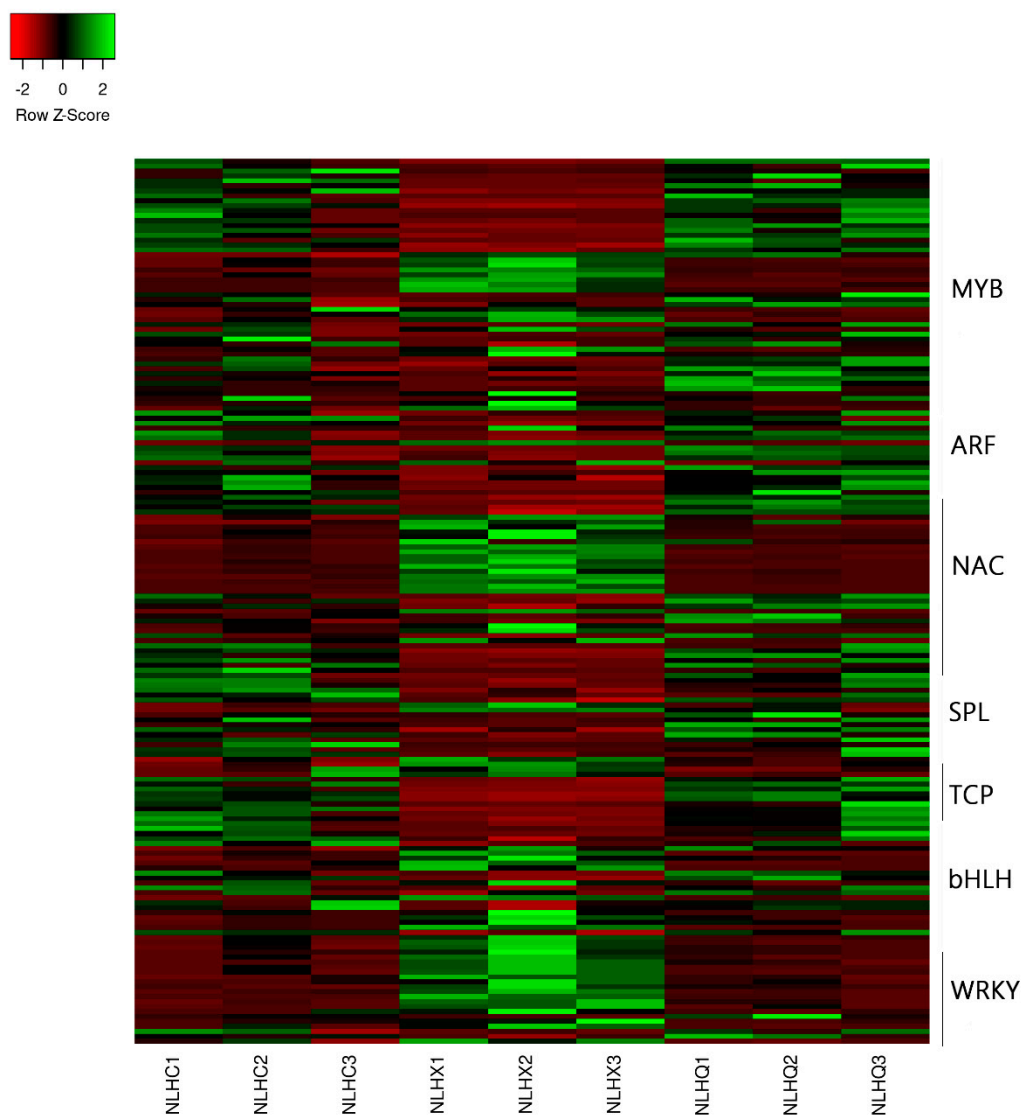

Supplement: s1 [file s1]
