# Supplementary figures and images for: Accumulation of Anthocyanidins Determines Leaf Color of Liquidambar Formosana as Revealed by Transcriptome Sequencing and Metabolism Analysis
Source: MDPI journal article supplement (doi:10.3390/cimb44010018), 2022-01-07

Supplementary Figure S3: GO classification of DEGs in NLHC vs NLHX, NLHX vs NLHQ, ZFC vs. NLHC.

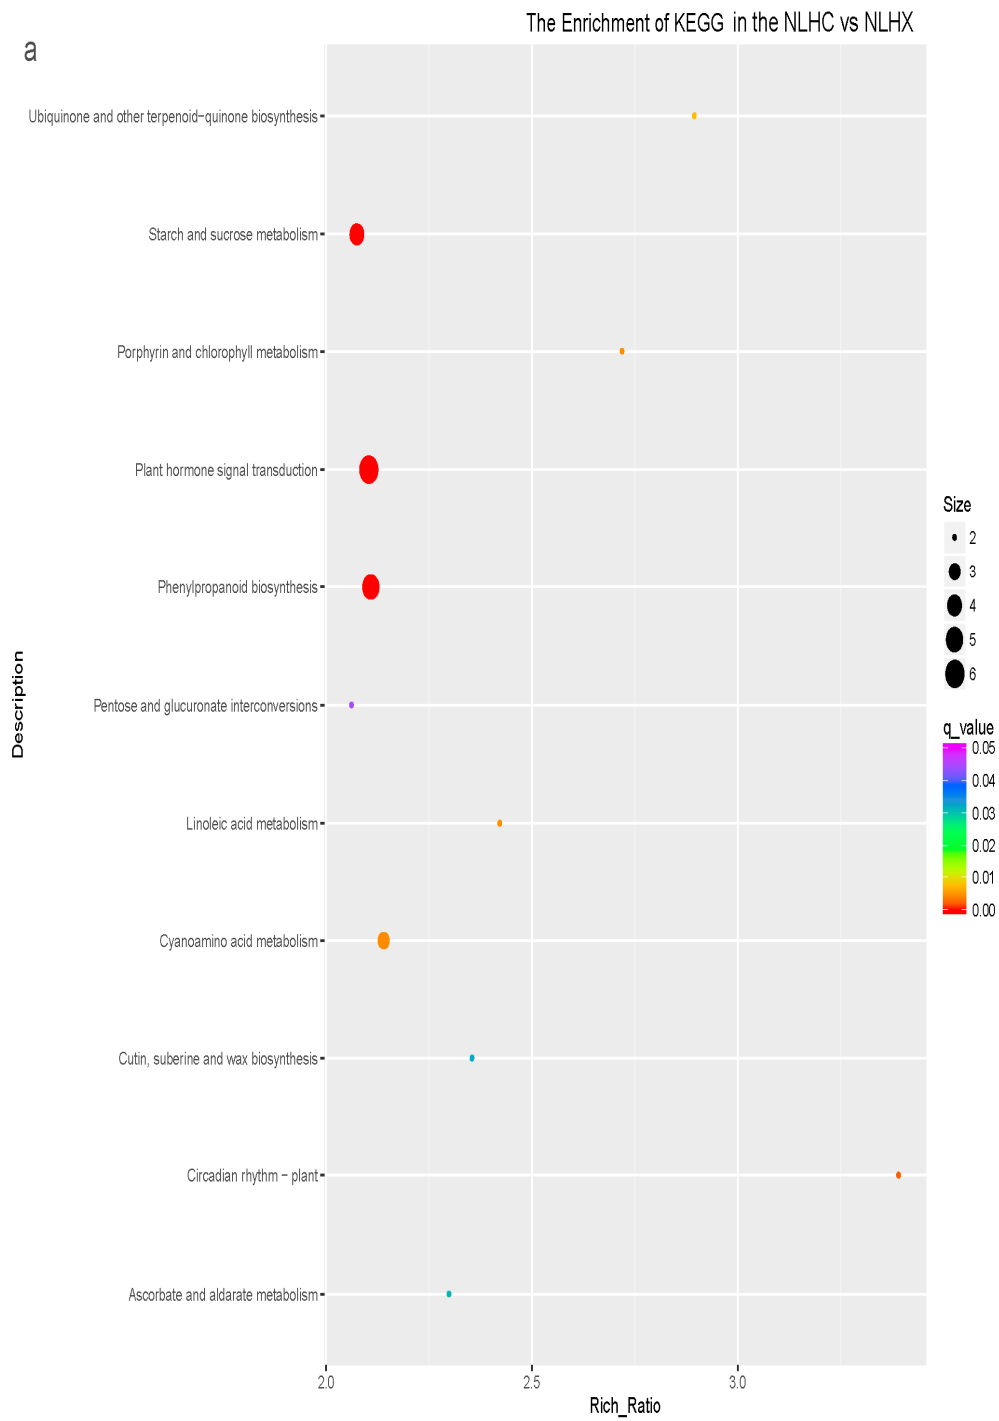

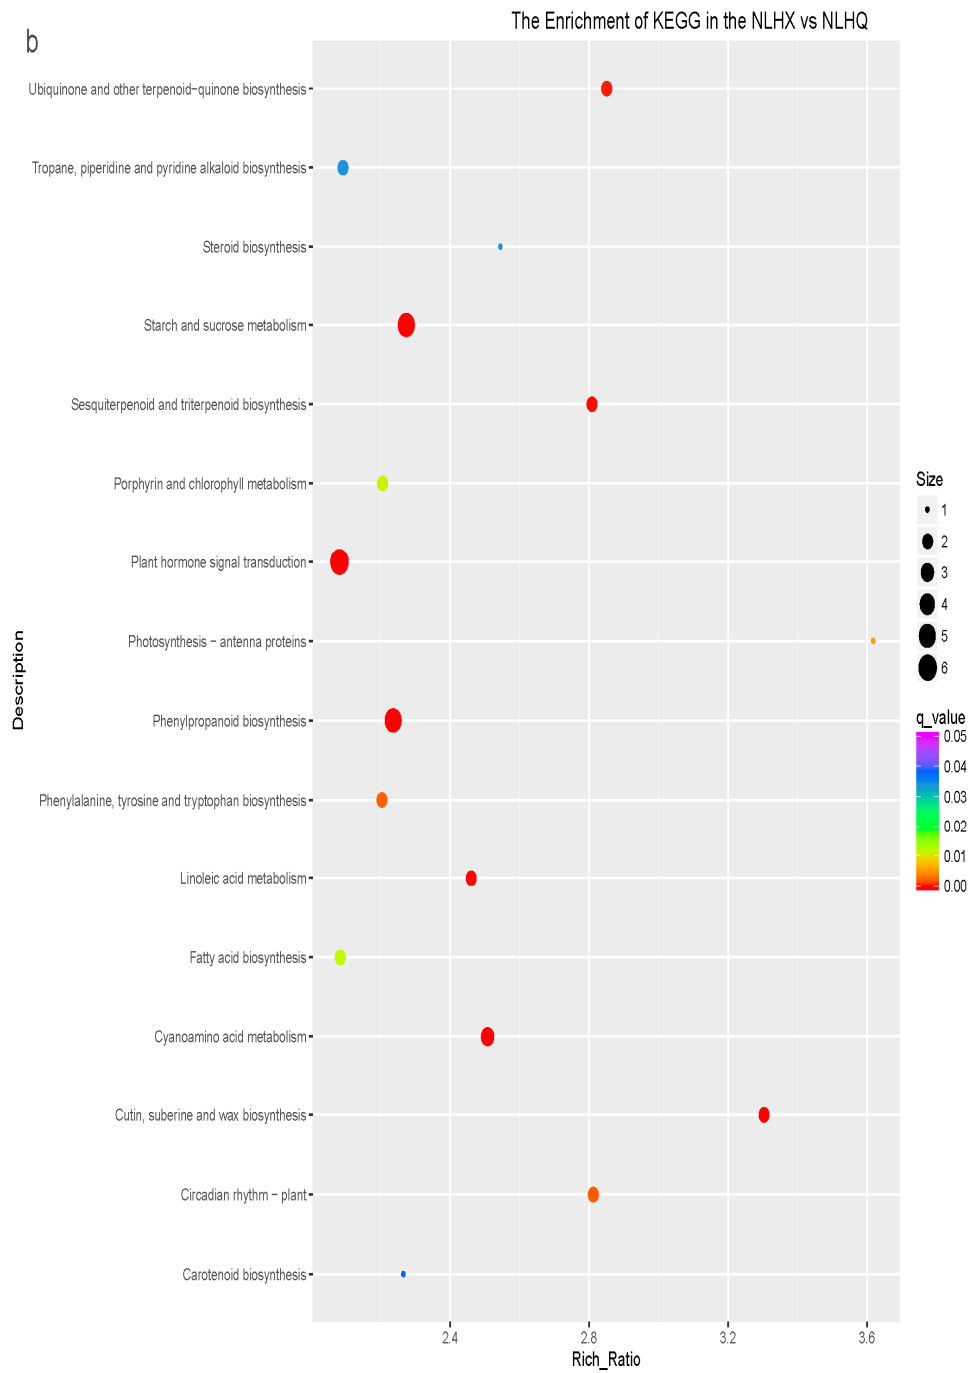

C

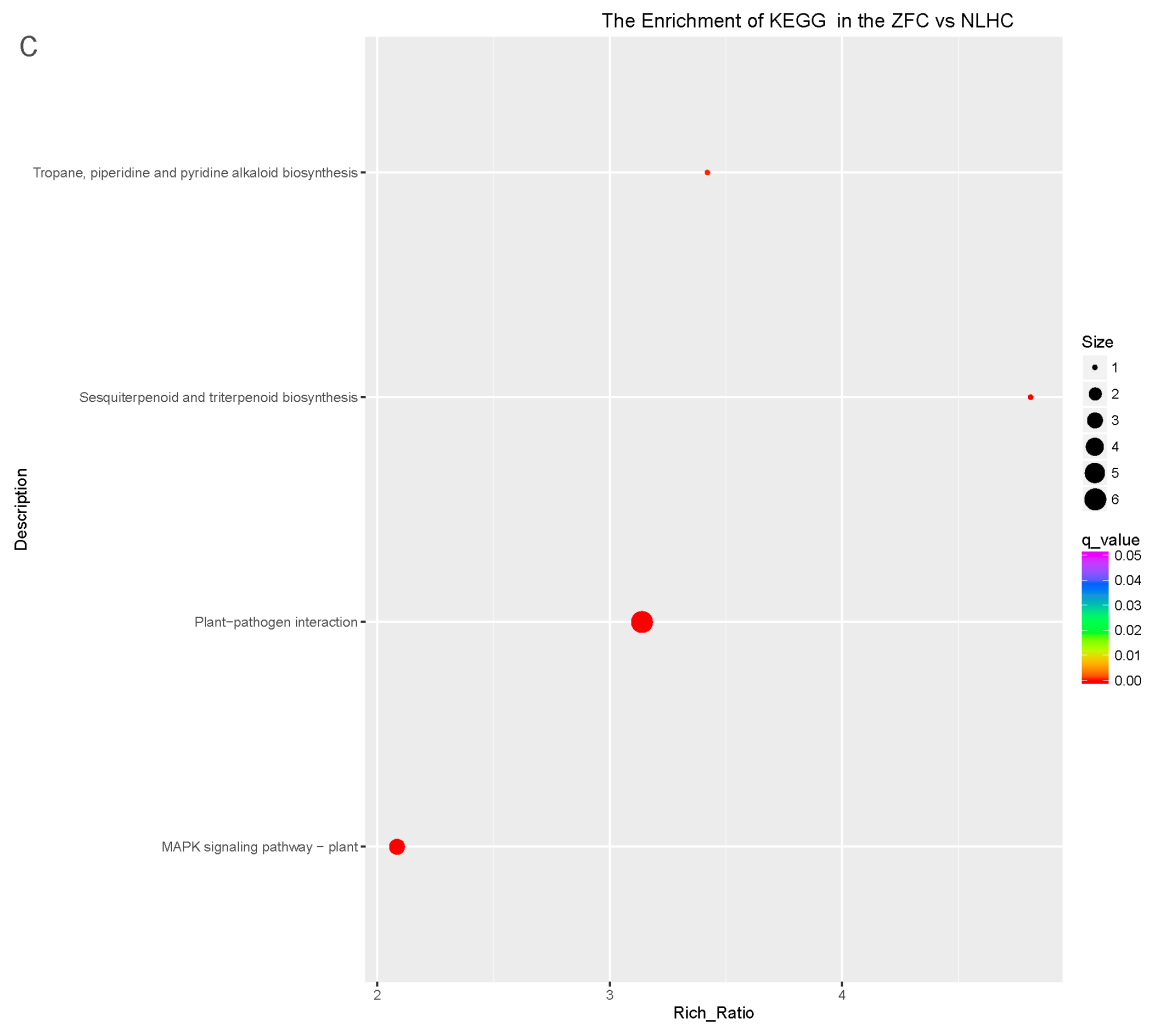

Supplement: s1 [file s1]

Supplementary Figure S2 Differential expression genes between different samples

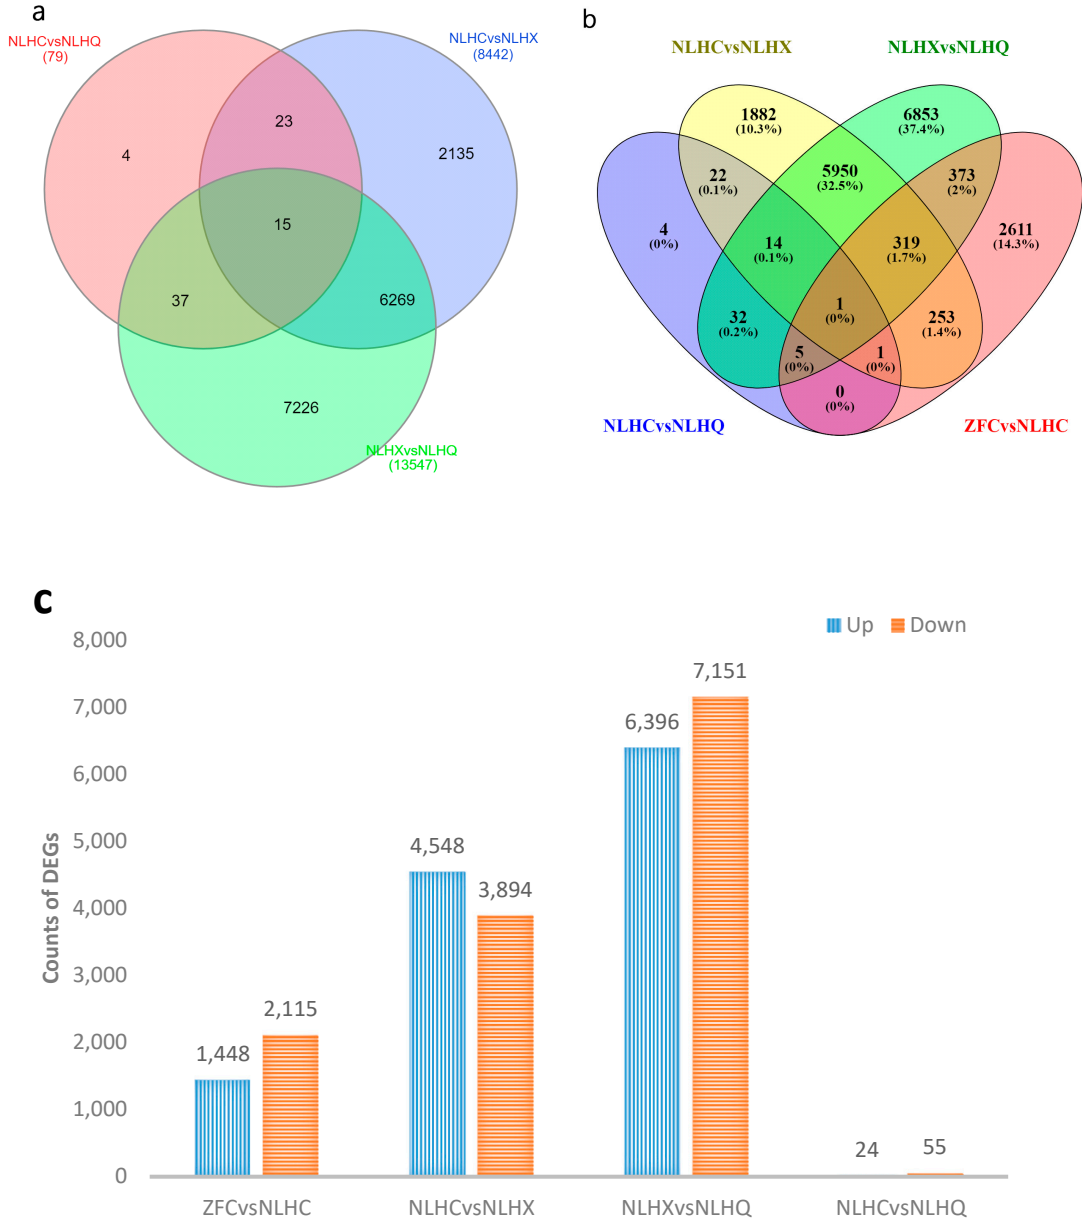

Supplement: s1 [file s1]
